# Supplementary material for: Role of inorganic ions and dissolved natural organic matters on persulfate oxidation of acid orange 7 with zero-valent iron
Source: Royal Society of Chemistry journal article supplement (doi:10.1039/c5ra16094d), 2015-01-01
Supplement: c5ra16094d1.pdf [file c5ra16094d1.pdf]

**Role of inorganic ions and dissolved natural organic matters on  
persulfate oxidation of acid orange 7 with zero-valent iron**

**Huanxuan Li<sup>a, b</sup>, Jinquan Wan<sup>a, b, c</sup>, Yongwen Ma<sup>a, b, c</sup>, Yan Wang<sup>a, b</sup>, Zeyu  
Guan<sup>a, b</sup>**

<sup>a</sup> School of Environment and Energy, South China University of Technology,  
Guangzhou 510006, PR China

<sup>b</sup> The Key Lab of Pollution Control and Ecosystem Restoration in Industry Clusters,  
Ministry of Education, China, Guangzhou 510006, PR China

<sup>c</sup> State Key Lab Pulp and Paper Engineering, South China University of Technology,  
Guangzhou 510640, PR China

**Table S1.** Initial and final pH of reaction solutions containing inorganic anions.

| Inorganic anions | Cl <sup>-</sup> | ClO <sub>4</sub> <sup>-</sup> | SO <sub>4</sub> <sup>2-</sup> | NO <sub>3</sub> <sup>-</sup> | NO <sub>2</sub> <sup>-</sup> | CH <sub>3</sub> COO <sup>-</sup> | HCO <sub>3</sub> <sup>-</sup> | CO <sub>3</sub> <sup>2-</sup> | H <sub>2</sub> PO <sub>4</sub> <sup>-</sup> | HPO <sub>4</sub> <sup>2-</sup> |
|------------------|-----------------|-------------------------------|-------------------------------|------------------------------|------------------------------|----------------------------------|-------------------------------|-------------------------------|---------------------------------------------|--------------------------------|
| Initial pH       | 2.98            | 2.97                          | 3.35                          | 2.96                         | 4.79                         | 6.24                             | 9.70                          | 11.15                         | 3.71                                        | 8.40                           |
| Final pH         | 3.46            | 3.02                          | 3.32                          | 2.79                         | 4.19                         | 3.85                             | 3.61                          | 3.32                          | 3.72                                        | 3.57                           |

**Table S2.** Initial and final pH of reaction solutions containing organic matters.

| Organic matters | HA   | EDTA |
|-----------------|------|------|
| Initial pH      | 2.97 | 4.23 |
| Final pH        | 2.87 | 4.06 |

**Table S3.** Pseudo-first-order rate constants for PS oxidation of AO7 in the presence of various concentrations of nitrite ions

| C <sub>NO<sub>2</sub></sub> (mM) | K <sub>obs</sub> (min <sup>-1</sup> ) | Half-life, t <sub>1/2</sub> (min) | R <sup>2</sup> |
|----------------------------------|---------------------------------------|-----------------------------------|----------------|
| 0                                | 0.048                                 | 19.8                              | 0.963          |
| 10                               | 0.004                                 | 170.8                             | 0.995          |
| 30                               | 0.001                                 | 689.6                             | 0.979          |
| 50                               | 0.001                                 | 690.1                             | 0.990          |
| 70                               | 0.002                                 | 347.5                             | 0.983          |
| 100                              | 0.002                                 | 345.1                             | 0.977          |

**Table S4.** Pseudo-first-order rate constants for PS oxidation of AO7 in the presence of various concentrations of perchlorate ion

| $C_{\text{ClO}_4^-}$ (mM) | $K_{\text{obs}}$ ( $\text{min}^{-1}$ ) | Half-life, $t_{1/2}$ (min) | $R^2$ |
|---------------------------|----------------------------------------|----------------------------|-------|
| 0                         | 0.048                                  | 19.8                       | 0.963 |
| 10                        | 0.067                                  | 8.5                        | 0.964 |
| 30                        | 0.06                                   | 10.7                       | 0.949 |
| 50                        | 0.074                                  | 7.4                        | 0.964 |
| 70                        | 0.056                                  | 13.8                       | 0.981 |
| 100                       | 0.05                                   | 18.6                       | 0.977 |

**Table S5.** Pseudo-first-order rate constants for PS oxidation of AO7 in the presence of various concentrations of acetate ion

| $C_{\text{CH}_3\text{COO}^-}$ (mM) | $K_{\text{obs}}$ ( $\text{min}^{-1}$ ) | Half-life, $t_{1/2}$ (min) | $R^2$ |
|------------------------------------|----------------------------------------|----------------------------|-------|
| 0                                  | 0.048                                  | 19.8                       | 0.963 |
| 10                                 | 0.064                                  | 10.2                       | 0.993 |
| 30                                 | 0.058                                  | 11.5                       | 0.996 |
| 50                                 | 0.055                                  | 12.7                       | 0.999 |
| 70                                 | 0.03                                   | 22.2                       | 0.998 |
| 100                                | 0.028                                  | 21.8                       | 0.989 |

**Table S6.** Pseudo-first-order rate constants for PS oxidation of AO7 in the presence of various concentrations of humic acid

| $C_{\text{HA}}(\text{mg/L})$ | $K_{\text{obs}} (\text{min}^{-1})$ | Half-life, $t_{1/2}(\text{min})$ | $R^2$ |
|------------------------------|------------------------------------|----------------------------------|-------|
| 0                            | 0.048                              | 19.8                             | 0.963 |
| 0.5                          | 0.101                              | 7.6                              | 0.989 |
| 1                            | 0.105                              | 7.0                              | 0.971 |
| 5                            | 0.049                              | 19.0                             | 0.976 |
| 7.5                          | 0.041                              | 23.6                             | 0.996 |
| 10                           | 0.045                              | 21.8                             | 0.992 |

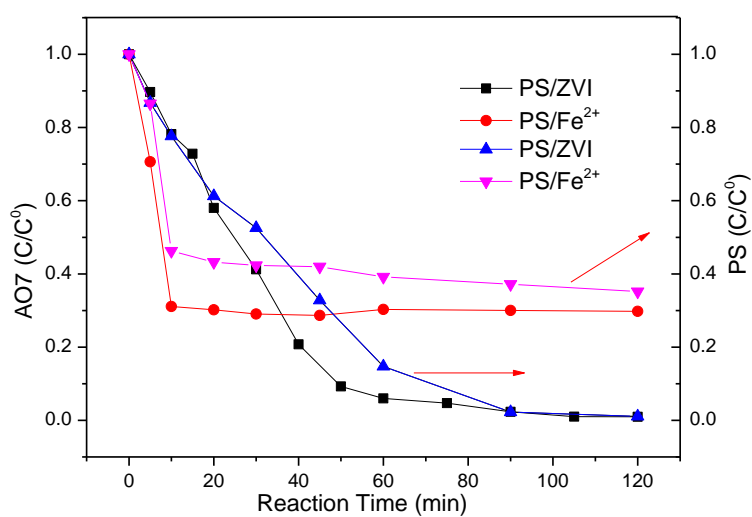

Fig. S1. The decomposition of AO7 and PS under PS/ZVI and PS/Fe<sup>2+</sup> systems. Experiment condition: PS = 2 mM; AO7 = 0.2 mM; ZVI = 0.5 g/L; FeSO<sub>4</sub> · 7H<sub>2</sub>O = 2.48 g/L; pH = 3.8 ± 0.1; T = 25 °C
